# Supplementary material for: The Stemness-High Human Colorectal Cancer Cells Promote Angiogenesis by Producing Higher Amounts of Angiogenic Cytokines via Activation of the Egfr/Akt/Nf-κB Pathway
Source: MDPI journal article supplement (doi:10.3390/ijms22031355), 2021-01-29
Supplement: s1 [file s1]

Supplementary Materials

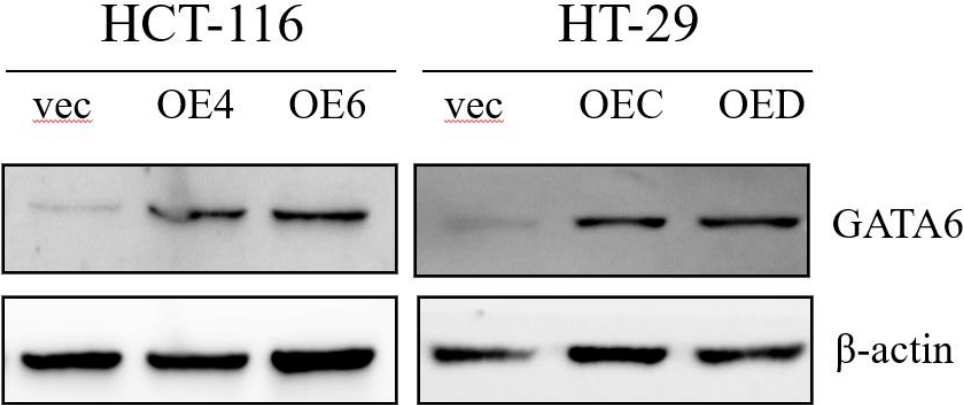

**Figure S1.** The protein levels of GATA6 in the GATA6-overexpressing HCT-116- and HT-29 clones, respectively. Total lysates (20  $\mu$ g) prepared from the vector- and GATA6-overexpressing HCT-116 and HT-29 clones, respectively, were subjected to western blot analyses using antibodies against GATA6.  $\beta$ -actin signals were used as loading controls.
